1 **Trends and key disparities of obesity among US adolescents: the NHANES from 2007**  
2 **to 2020**

3

4 Yangyang Deng<sup>1</sup>, Sami Yli-Piipari,<sup>2</sup> Omar El-Shahawy,<sup>3,4</sup> and Kosuke Tamura<sup>1</sup>

5

6

7

8 <sup>1</sup>Socio-Spatial Determinants of Health (SSDH) Laboratory, Population and Community Health  
9 Sciences Branch, Division of Research Program, National Institute on Minority Health and  
10 Health Disparities, National Institutes of Health, Bethesda, MD, USA

11

12 <sup>2</sup>Department of Kinesiology, Mary Frances Early College Education, University of Georgia,  
13 Athens, GA

14

15 <sup>3</sup>Department of Population Health, New York University Grossman School of Medicine, New  
16 York, NY

17

18 <sup>4</sup>Division of Global Health, New York University School of Global Public Health, New York,  
19 NY

20

21 \*Corresponding author: [yangyang.deng@nih.gov](mailto:yangyang.deng@nih.gov)

22

23 Yangyang Deng and Kosuke Tamura were responsible for the design and data collection, and  
24 statistical analysis, the literature review, data interpretation, and manuscript preparation. Sami  
25 Yli-Piipari edited the manuscript and provide expertise on the manuscript. Omar El-Shahawy  
26 edited the manuscript and helped with interpretation of the results.

27

28 There are no conflicts of interest to disclose or financial disclosures by any authors.

29

## 30 **Abstract**

31 This study aimed to estimate the trends in the body mass index (BMI) and prevalence of obesity  
32 among United States (U.S.) adolescents (10-19 years), and to examine the associations between  
33 sociodemographic factors and both BMI and obesity prevalence. The 2007-2020 National Health  
34 and Nutrition Examination Survey (NHANES), a nationally representative repeated cross-  
35 sectional survey data (n = 9,826) were used. Outcomes included: 1) Mean BMI and 2) obesity  
36 (yes/no; defined as BMI  $\geq$  95% percentile). Sociodemographic variables included age, sex,  
37 race/ethnicity, and poverty income ratio (PIR; low-income  $<1.3$ , Middle-income  $\geq 1.3$  and  $<3.5$ ,  
38 high-income  $\geq 3.5$ ). By accounting for the complex survey design, weighted generalized  
39 linear/Poisson models were used to conduct the analyses. Girls constituted 49 % of the sample.  
40 From 2007-2008 to 2017-2020, BMI and obesity prevalence increased across various subgroups,  
41 including Black and Hispanic adolescents, boys, and those from low- and middle-income  
42 families. Girls are a 12% lower likelihood of being obese than boys. Compared to White  
43 adolescents, Black and Hispanic adolescents had 22% and 19% greater risk of being obese.  
44 Compared to those from high-income families, adolescents from low- and middle-income  
45 families had 62% and 47% greater risk of being obese, respectively. The results indicated  
46 persistent disparities in obesity prevalence among different race/ethnic and sociodemographic  
47 groups. Future obesity intervention should address key disparities by targeting specific  
48 race/ethnic adolescents from low-income families and promoting health equality.

49

50

51

## 52 **Introduction**

53           The increasing prevalence of childhood obesity in the United States (U.S.) has become a  
54 significant public health concern, elevating the risk of developing cardiometabolic comorbidities  
55 among U.S. adolescents.(1-4) Recent data from the Centers for Disease Control and Prevention  
56 (CDC) (5) showed that the prevalence of obesity among children and adolescents aged 2–19  
57 years increased from 12 million (16.9%) in 2010 to 14.7 million (19.7%) in 2020. These  
58 concerning trends have long-term implications for the health and well-being of adolescents as  
59 they transition into adulthood.(6-8) The economic burden of obesity in the U.S. healthcare  
60 system was estimated to be \$173 billion in 2021.(9) Thus, monitoring national trends and  
61 examining the association between sociodemographic factors and weight-related outcomes  
62 among adolescents are critical to increase awareness and prevent childhood obesity.

63           Obesity among adolescents (aged 10-19 years) is defined as age- and sex-specific body  
64 mass index (BMI) greater than or equal to the 95th percentile based on the 2000 CDC growth  
65 chart.(4) Sociodemographic factors, such as age, sex, race/ethnicity, and socioeconomic status,  
66 have been associated with the prevalence of childhood obesity.(1, 10-12) For example, a recent  
67 study showed that there was a 4.5% increase in obesity prevalence among adolescents aged 12-  
68 19, from 17.7% in 2009-2010to 21.5% in 2017-2020.(13) Research showed a higher prevalence  
69 of obesity in boys than girls.(14)

70           This increased rates is particularly pronounced among certain racial and ethnic  
71 minorities.(15, 16) The most recent 2020 CDC data indicated that the prevalence of obesity  
72 among Black and Hispanic children were 24.8% and 26.2%, respectively, compared to 16.6%  
73 among White children.(5) In addition, youth from lower socioeconomic backgrounds are more  
74 likely to be obese than those from higher socioeconomic backgrounds,(15, 17) families with

75 lower incomes were 1.39 times more likely to have children who are obese than those from  
76 families with higher incomes.(18)

77 Nevertheless, most studies on sociodemographic factors in relation to childhood obesity  
78 were cross-sectional reporting point prevalence estimates,(19-21) with limited studies examining  
79 the key disparities in sociodemographic factors with long-term trends in mean BMI and obesity  
80 prevalence. Thus, there is highly limited studies on the most recent trends in obesity prevalence  
81 among U.S. adolescents aged 10-19 years. To address these gaps, we used a nationally  
82 representative sample from the National Health and Nutrition Examination Survey (NHANES)  
83 from 2007 to 2020. The aims of this study were two-fold: 1) to illustrate trends in mean BMI and  
84 obesity prevalence among U.S. adolescents, and 2) to examine how sociodemographic factors  
85 were associated with the mean BMI and obesity prevalence among this sample of U.S.  
86 adolescents.

87

## 88 **Methods**

### 89 **Study sample**

90 This study utilized data from the NHANES from 2007 to 2020,(22) including the cross-  
91 sectional survey waves for years 2007-2008, 2009-2010, 2011-2012, 2013-2014, 2015-2016, and  
92 2017-2020. To maintain a nationally representative estimates, the 2017-2020 period included the  
93 data until the beginning of the COVID-19 pandemic in March 2020. (5) NHANES uses a  
94 stratified multistage sampling method to represent the US population. The sampling frame  
95 included a total of 11,357 participants aged 10-19 years. Pregnant participants or those without  
96 outcome measurements were excluded from the analysis (n = 1531 [13.5%]), resulting in the  
97 final analytical sample of N=9,826 across the six NHANES waves from 2007 to 2020 (eFig. 1 in

98 the Supplement). The NHANES protocol was approved by the National Center for Health  
99 Statistics research ethics review board, and all participants provided written informed consent.

100

## 101 **Measures**

102 All body measurements were assessed in accordance with a standardized protocol using  
103 calibrated instruments.(5) Standing height of the participants was measured using a portal  
104 stadiometer and weight was measured using a portal digital weight scale. BMI was calculated by  
105 dividing weight in kilograms by squared height in meters. We further calculated their BMI  
106 percentile based on the relevant CDC growth charts for children and adolescents, which included  
107 ages 10 to 19 years.(23) The adolescent's obesity were evaluated as their BMI percentile to  
108 classify into underweight (less than 5th percentile), normal weight (5th to 84th percentile),  
109 overweight (85th to 94th percentile), and obesity (at or above 95th percentile). A binary  
110 adolescent's obesity outcome (Yes, No) was defined as 95th percentile (referent)  $< \text{BMI} \geq 95\text{th}$   
111 percentile.(23)

112 Sociodemographic variables included age, sex (girls/boys), race/ethnicity, and poverty  
113 income ratio (PIR). Age was self-reported during the interview and was divided into two age  
114 groups: 10 to 14 years and 15 to 19 years.(24) Race/ethnicity was categorized as non-Hispanic  
115 White (referent), non-Hispanic Black, Hispanic (including Mexican American and other  
116 Hispanic), and other (including multi-racial).(25, 26) The PIR is a measure of family income  
117 relative to poverty guidelines, which was determined by dividing family income by the poverty  
118 threshold specific to a family size and geographic location income levels were defined based on  
119 the PIR and coded as low income ( $\text{PIR} < 1.3$ ), middle income ( $\text{PIR} \geq 1.3$  and  $< 3.5$ ), and high  
120 income ( $\text{PIR} \geq 3.5$ ).(27)

## 121 **Statistical analyses**

122           Preparing the data involved several steps, such as removing missing values, examining  
123 the distribution, and identifying and removing outliers. Survey analysis procedures were used to  
124 derive nationally representative estimates, accounting for sampling weights, strata, and primary  
125 sampling units (PSU) in the NHANES complex sampling design.(28)

126           A survey-weighted linear regression model was used to evaluate BMI trends, both overall  
127 and stratified by the subgroups (age, sex, race/ethnicity, and PIR), 2007 through 2020.

128           Subsequently, a survey-weighted Poisson regression model was used to evaluate the prevalence  
129 of obesity trends, both overall and by the subgroups (age, sex, race/ethnicity, and PIR), 2007  
130 through 2020. To evaluate the statistical heterogeneity of trends by subgroups, we used a survey-  
131 weighted Wald test for an interaction term between survey cycle and sociodemographic factors  
132 such as age, sex, race/ethnicity, and PIR. For each survey cycle, we report 95% confidence  
133 intervals (CI) for all estimates.

134           We used multivariate survey-weighted generalized linear/Poisson regression models with  
135 robust standard errors to examine the association between sociodemographic factors and mean  
136 BMI and obesity prevalence, adjusting for survey wave. Statistical significance was determined  
137 by p-value < 0.05 (2-tailed). All analyses were conducted using the R statistical software  
138 "Survey" package (e.g., "svymean" and "svyglm"), taking into account the complex sampling  
139 design (version 4.2.2; [www.r-project.org](http://www.r-project.org)).

140

## 141 **Results**

### 142 **Characteristics of study population**

143           The nationally representative sample characteristics from 2007-2008 through 2017-2020,  
144 and the characteristics were presented in Table 1. The total sample comprised 9,826 adolescents  
145 with mean age =14.29 (SD = ± 2.78), of which 49.0% were girls. The mean BMI increased from  
146 22.85 (95% CI: 22.40-23.29) in 2007-2008 to 23.66 (95% CI: 23.15-24.03) in 2017-2020.  
147 Furthermore, the prevalence of obesity increased from 20.71% (95% CI: 17.16-24.27) in 2007-  
148 2008 to 23.99% (95% CI: 21.31-26.67) in 2017-2020. In the overall analyses, there were no  
149 significant trends in the mean BMI changes and the overall prevalence of obesity (Table 1,  
150 eTables 1 and 2). Figure 1 showed overall obesity prevalence weighted proportions, stratified by  
151 age, sex, race/ethnicity, and PIR. Notably, Black and Hispanic adolescents showed higher  
152 obesity prevalence proportion rates than other race/ethnicity. Moreover, adolescents from low-  
153 income demonstrated the highest prevalence.

154           The Wald test analysis did not reveal any significant interaction between survey cycle  
155 and both BMI and obesity prevalence concerning age groups and sex. However, a significant  
156 interaction effect between survey cycle and both BMI and obesity prevalence was observed  
157 across various race/ethnic and PIR groups (eTables 1 and 2).

Table 1. Descriptive table of children and adolescents aged 10-19 years old, by overall, sex, and race/ethnicity from 2007 to 2020

| Characteristics                      | N=9,826 (survey weighted %) <sup>a</sup> |                          |                          |                          |                          |                          |                          |
|--------------------------------------|------------------------------------------|--------------------------|--------------------------|--------------------------|--------------------------|--------------------------|--------------------------|
|                                      | All<br>(n = 9,826)                       | 2007-2008<br>(n = 1,455) | 2009-2010<br>(n = 1,546) | 2011-2012<br>(n = 1,468) | 2013-2014<br>(n = 1,671) | 2015-2016<br>(n = 1,507) | 2017-2020<br>(n = 2,179) |
| <b>Age group (%)</b>                 |                                          |                          |                          |                          |                          |                          |                          |
| 10-14                                | 6,312 (62.0)                             | 936 (60.7)               | 966 (61.8)               | 949 (62.8)               | 1060 (61.2)              | 991 (64.4)               | 1,410 (60.9)             |
| 15-19                                | 3,514 (38.0)                             | 519 (39.3)               | 580 (38.1)               | 519 (37.2)               | 611 (38.8)               | 516 (35.6)               | 769 (39.1)               |
| <b>Sex (%)</b>                       |                                          |                          |                          |                          |                          |                          |                          |
| Boys                                 | 5,540 (51.0)                             | 770 (52.6)               | 810 (50.7)               | 736 (50.8)               | 838 (51.0)               | 764 (51.1)               | 1097 (49.5)              |
| Girls                                | 5,276 (49.0)                             | 685 (47.4)               | 736 (49.3)               | 732 (49.2)               | 833 (49.0)               | 745 (48.9)               | 1082 (50.5)              |
| <b>Race/Ethnicity (%)</b>            |                                          |                          |                          |                          |                          |                          |                          |
| White                                | 2,934 (56.8)                             | 475 (62.1)               | 519 (59.1)               | 351 (56.6)               | 438 (54.6)               | 446 (55.7)               | 705 (52.1)               |
| Black                                | 2,472 (14.0)                             | 377 (14.3)               | 345 (14.5)               | 455 (15.2)               | 423 (14.1)               | 490 (13.0)               | 551 (13.0)               |
| Hispanic                             | 3,099 (20.9)                             | 535 (17.9)               | 585 (19.3)               | 420 (20.8)               | 545 (22.1)               | 321 (21.1)               | 524 (24.1)               |
| Other race <sup>b</sup>              | 1,321 (8.3)                              | 68 (5.7)                 | 97 (7.1)                 | 243 (7.4)                | 265 (9.2)                | 250 (10.2)               | 399 (10.8)               |
| <b>PIR (%)</b>                       |                                          |                          |                          |                          |                          |                          |                          |
| PIR ≥ 3.5<br>(high-income)           | 2,125 (32.0)                             | 328 (35.1)               | 322 (34.2)               | 312 (29.6)               | 342 (29.0)               | 312 (30.7)               | 509 (33.8)               |
| PIR 1.35 to < 3.5<br>(middle-income) | 3,520 (36.8)                             | 516 (33.4)               | 553 (35.8)               | 486 (35.5)               | 549 (36.8)               | 608 (42.1)               | 808 (37.3)               |
| PIR < 1.3<br>(low-income)            | 4,181 (31.5)                             | 611 (31.5)               | 671 (30.0)               | 670 (34.9)               | 780 (34.2)               | 587 (27.2)               | 862 (28.8)               |
| <b>Outcomes</b>                      |                                          |                          |                          |                          |                          |                          |                          |
| BMI (Mean)                           | 23.20 ± 6.02                             | 22.85 ± 5.68             | 23.03 ± 5.73             | 23.14 ± 6.00             | 23.41 ± 6.38             | 23.20 ± 5.94             | 23.59 ± 6.31             |
| <b>Obesity (%)</b>                   |                                          |                          |                          |                          |                          |                          |                          |
| Yes                                  | 2,346 (22.0)                             | 341 (20.71)              | 347 (20.43)              | 329 (21.90)              | 385 (22.94)              | 361 (21.92)              | 583 (23.99)              |
| No                                   | 7,480 (78.0)                             | 1,114 (79.29)            | 1,199 (79.57)            | 1,139 (78.10)            | 1,286 (77.06)            | 1,146 (78.08)            | 1,596 (76.01)            |



---

Abbreviations: BMI, body mass index

Values are presented as frequency (weighted %) and mean  $\pm$  SD.

<sup>a</sup>Data were weighted to be nationally representative.

<sup>b</sup>Other race include individuals self-identifying as non-Hispanic Asian, Other, or being from more than one race or ethnic group.

159 **Fig 1. Weighted proportions in obesity prevalence stratify by sex, age and race/ethnicity**  
160 **and poverty income ratio from 2007-2008 to 2017-2020**

161  
162 **Sociodemographic stratified trends and disparities in the BMI and**  
163 **prevalence of obesity**

164 For 15-19 age group (with 10-14 as the reference group), mean BMI level significantly  
165 increased from 24.48 (95% CI: 23.84-25.13) in 2007-2008 to 25.53 (95% CI: 24.94-26.12) in  
166 2020 ( $p < 0.001$ ) (efig2 (a), and eTable 1 in the Supplement). However, the prevalence of obesity  
167 did not significantly increase from 20.62 (95% CI: 16.98-24.25) to 22.11 (95% CI: 18.29-25.94)  
168 (eTable 2 in the Supplement). For girls (boys [reference]), mean BMI levels did not significantly  
169 increase from 22.11 (95% CI: 22.33-23.50) in 2007-2008 to 23.78 (95% CI: 23.23-24.33) in  
170 2017-2020 ( $p > 0.05$ ) (efig2 (b), and eTable 1 in the Supplement). However, there is a significant  
171 the prevalence of obesity increases for girls (boys [reference]), from 18.24 (16.08-20.41) in  
172 2007-2008 to 22.11 (95% CI: 18.47-26.22) in 2017-2020 ( $p < 0.01$ ).

173  
174 **Fig 2. Trends in prevalence of obesity among US adults (aged 10-19), NHANES 2007-2020**  
175 **by (a) Age, (b) Sex, (c) Race/ethnicity, and (d) Poverty Income Ratio.**

176  
177 Among race/ethnic groups, Black adolescents had the highest increase in mean BMI from  
178 23.90 (95% CI: 23.28-24.53) to 25.92 (95% CI: 24.28-25.56) ( $p < 0.001$ ) between 2007 and 2020  
179 (efig 2 [c], in the Supplement). Hispanic adolescents also had the increase in mean BMI from  
180 22.54 (95% CI: 22.89-24.18) to 24.07 (95% CI: 23.31-24.83) ( $p < 0.001$ ). Yet, there was no  
181 significant trend in the Other race group. Similarly, for the obesity prevalence (fig 2 [c]), Black

182 adolescents also had the highest increase, with a rise of 5.7% from 24.96 (95% CI: 22.07-33.45)  
183 to 30.62 (95% CI: 27.18-34.06) ( $p < 0.001$ ) in 2007-2020. In addition, Hispanic adolescents had  
184 an increase from 24.21 (95% CI: 20.78-28.67) to 29.05 (95% CI: 22.97-35.13) ( $p < 0.001$ ).  
185 However, there was no significant trend in the Other race.

186 Comparing adolescents from high income families ( $PIR \geq 3.5$ ), adolescents from low  
187 income ( $PIR < 1.3$ ) and middle-income families ( $PIR 1.3$  to  $< 3.5$ ) had significant increases in  
188 mean BMI (efig 2 [d], in the Supplement). Specifically, the low-income group had a mean BMI  
189 of 23.57 (95% CI: 22.83-24.31), and the middle-income group had a mean BMI of 22.84 (95%  
190 CI: 22.10-23.59) in 2007-2008 to 24.82 (95% CI: 24.22-25.42), and 23.67 (95% CI: 22.96-24.38)  
191 in 2017-2020. The prevalence of obesity also increased significantly in the middle-income group,  
192 from 20.52 (95% CI: 16.91-24.14) in 2007-2008 to 25.45 (95% CI: 21.32-29.58) in 2017-2020.  
193 However, there was a significant decrease in the prevalence of obesity in the high-income group  
194 with  $PIR \geq 3.5$ , from 17.31 (95% CI: 17.31-22.21) in 2007-2008 to 14.44 (95% CI: 11.50-17.38)  
195 in 2017-2020.

196

## 197 **Association of sociodemographic factors with BMI and obesity**

198 Table 2 showed that age, sex, race/ethnicity, and PIR were significantly associated with  
199 mean BMI. Adolescents aged 15-19 years had a higher BMI ( $\beta=3.27$ , 95% CI: 2.91-3.62)  
200 compared to ones aged 10-14 years. Black and Hispanic adolescents had a higher BMI ( $\beta=1.10$ ,  
201 95% CI: 0.59-1.62, and  $\beta=0.69$ , 95% CI: 0.29-1.09, respectively), compared to White  
202 counterparts. Furthermore, low and middle-income adolescents had a higher BMI ( $\beta=1.43$ , 95%  
203 CI: 1.04-1.83,  $\beta=1.09$ , 95% CI: 0.60-1.60, respectively) than ones from high-income families.

204

Table 2. Weighted generalized linear/Poisson models for obesity among US children and adolescents aged 10-19 years old, 2007-2020

|                                    | Mean BMI                    |         | Prevalence of obesity                 |         |
|------------------------------------|-----------------------------|---------|---------------------------------------|---------|
|                                    | Adjusted $\beta$<br>(95%CI) | P-value | Adjusted prevalence<br>ratio (95% CI) | P-value |
| <b>Age group</b>                   |                             |         |                                       |         |
| 10-14                              | reference                   |         | 1.00 (reference)                      |         |
| 15-19                              | 3.27 (2.91, 3.62)           | <0.001  | 0.95 (0.85, 1.05)                     | 0.166   |
| <b>Sex</b>                         |                             |         |                                       |         |
| Boys                               | reference                   |         | 1.00 (reference)                      |         |
| Girls                              | 0.23 (-0.08, 0.53)          | >0.05   | 0.88 (0.81, 0.96)                     | <0.01   |
| <b>Race/Ethnicity</b>              |                             |         |                                       |         |
| Non-Hispanic white                 | Reference                   |         | 1.00 (reference)                      |         |
| Non-Hispanic black                 | 1.10 (0.59, 1.62)           | <0.001  | 1.22 (1.06, 1.40)                     | <0.01   |
| Hispanic                           | 0.69 (0.29, 1.09)           | <0.001  | 1.19 (1.05, 1.36)                     | <0.01   |
| Other Race <sup>a</sup>            | -0.37 (-0.95, 0.22)         | >0.05   | 0.93 (0.82, 1.04)                     | >0.05   |
| <b>Poverty Income Ratio</b>        |                             |         |                                       |         |
| PIR $\leq$ 3.5<br>(high-income)    | reference                   |         | 1.00 (reference)                      |         |
| PIR < 1.3<br>(low-income)          | 1.43 (1.04, 1.83)           | <0.001  | 1.62 (1.39, 1.90)                     | <0.001  |
| PIR 1.3 to <3.5<br>(middle-income) | 1.09 (0.60, 1.60)           | <0.001  | 1.47 (1.24, 1.76)                     | <0.001  |

Models were adjusted for survey year.

<sup>a</sup>Other race include individuals self-identifying as non-Hispanic Asian, Other, or being from more than one race or ethnic group.

205 Table 2 showed there was no statistically significant relationship between age and obesity  
 206 prevalence. Girls had a lower likelihood of obesity compared to boys (AOR=0.88; 95% CI, 0.81-  
 207 0.96, p<0.01). Furthermore, Black and Hispanic adolescents had a higher risk of obesity than  
 208 White adolescents (Adjusted odds ratio Black; (AOR)=1.22; 95% CI: 1.06-1.40, p<0.01; and  
 209 Hispanic; AOR=1.19; 95% CI, 1.05-1.36, p<0.01, respectively). Additionally, adolescents with a  
 210 low and middle income were 62% and 47% more likely to be obese, compared to ones from high  
 211 income groups.

## 212 **Discussion**

213 We examined trends in BMI and obesity prevalence among US adolescents using  
214 nationally representative NHANES data from 2007-2008 to 2017-2020. This study provided the  
215 most up-to-date available US nationally representative trends over the decade. Our findings  
216 indicated that adolescent obesity continued to increase in the US over the past decade. We found  
217 the increase in both mean BMI and obesity prevalence from 2007-2008 to 2017-2020 among  
218 several subgroups of adolescents, including boys and girls, Black and Hispanic adolescents  
219 (compared to White counterparts), and those from low and middle-income backgrounds  
220 (compared to high-income background). In contrast, we found a decrease in obesity prevalence  
221 among those from high-income groups. Our analysis also revealed persistent disparities among  
222 certain racial minorities (Black and Hispanic adolescents) and those in low and middle-income  
223 groups (PIR  $\leq 1.3$  and PIR 1.35 to  $< 3.5$ ) who had greater odds of being obesity. These findings  
224 underscore the importance of targeted interventions to address the growing obesity epidemic  
225 among US adolescents, particularly those from minority groups and lower socioeconomic status  
226 backgrounds.

227 The BMI increased from 22.85 kg/m<sup>2</sup> in 2007-2008 to 23.59 kg/m<sup>2</sup> in 2017-2020 among  
228 adolescents aged 10-19, while the prevalence of obesity increased by 3.7% from 20.7% to 24%  
229 over the same time period. Our findings were consistent with prior research indicating that  
230 childhood obesity remained high in the U.S., with approximately 1 in 5 children affected 12- to  
231 19-year-olds.(29) Notably, our study provides updated data on this trend compared to 2017-  
232 2020. In addition, our study findings are consistent with a recent study that reported a 4.5%  
233 increase in obesity prevalence among adolescents aged 12-19 from 2009-2010 to 2017-2020, yet  
234 presented only unadjusted prevalence estimates,(13) Our study included a longer time span than

235 these previous studies through a robust multivariate survey-weighted data analysis, with  
236 adjusting for key sociodemographic factors and survey cycle. Our findings demonstrated  
237 disparities in race/ethnic groups and income-levels leading to obesity among U.S. adolescents.  
238 Additionally, compared to girls, boys had a higher prevalence of obesity from 22.0% in 2007-  
239 2008 to 25.3% in 2017-2020. This finding was consistent with previous study that the prevalence  
240 was slightly higher in boys.(30) Considering sex will enable us to develop more effective and  
241 tailored strategies to improve the overall well-being and outcomes of this vulnerable population.

242 We found that the prevalence of obesity continues to increase among certain race/ethnic  
243 groups, as well as low-income groups. Compared to White counterparts, Black and Hispanic  
244 adolescents had higher obesity rates in 2017-2020 (30.62% and 29.05%, respectively). These  
245 findings are consistent with previous studies,(12, 30, 31) that Black and Hispanic adolescents as  
246 having the highest obesity rates among all minority groups. Other races including Asian  
247 adolescents had a lower prevalence of obesity in all age and sex groups, which is also in line the  
248 with earlier research.(32) However, it is important to note that Asians have different body  
249 compositions, and Asian children with a normal BMI range, meant for White children may still  
250 be considered overweight or obese according to Asian-specific criteria.(33) In addition, we found  
251 a decreasing trend from 17.31% in 2007-2008 to 14.44% in 2017-2020 among high income  
252 groups. Conversely, low-income (PIR < 1.3) and middle income (PIR 1.3 to < 3.5) had  
253 significant increases in mean BMI and obesity prevalence were observed for both groups.  
254 Consistent with the pervious result showing that adolescents from low-income families had a  
255 greater chance of being obese,(15) our study highlights a concerning trend of rising obesity rates  
256 among adolescents from low- and middle-income groups.(34) Since adolescents from low-  
257 income families often encounter challenges, such as limited access to healthy foods and

258 opportunities for physical activity,(35) they may face obstacles in making healthier choices than  
259 those from high-income families.(36, 37)

260 Our overall analyses examining association between sociodemographic factors and BMI  
261 and obesity revealed persistent disparities among Black and Hispanic adolescents. Black and  
262 Hispanic adolescents had 23% and 19% greater odds of being obese compared to White  
263 counterparts. Adolescents from low and middle-income groups had higher odds of obesity, while  
264 the high-income group had lower odds. These results align with previous studies,(38) indicating  
265 that socioeconomic inequalities play a significant role in shaping access to neighborhood and  
266 social resources. Furthermore, a previous systematic review demonstrated that approximately  
267 40% of studies have identified a widening socioeconomic inequality gap since 2000.(39) A  
268 possible explanation may be that these disparities in obesity prevalence among different  
269 race/ethnic and income groups may be linked to various factors such as residing in unsafe  
270 neighborhoods that limit opportunities (40) and limited access to healthy food options.(41)  
271 Furthermore, another study indicated that adolescents from low socioeconomic neighborhoods  
272 are more exposed to poverty, crime, low social cohesion, higher levels of air pollution, lack of  
273 green spaces, and poor quality of the built environment, which can increase the likelihood of  
274 obesity.(42) Adolescence is a critical period for preventing obesity, the results of our study  
275 underscore the substantial disparities in the prevalence of obesity existing among youth.  
276 Therefore, future research should address these disparities and promote health equality.

277 The strengths of this study included assessment of the most up to-date available data from  
278 NHANES to evaluate trends over the past 13 years. In addition, while the survey data is mostly  
279 self-reported and are subject to misclassification, a strength of the our approach is that the weight  
280 and height data collected from NHANES were measured by professional data collectors rather

281 than self-report, increasing the accuracy and reliability of the results by reducing personal  
282 bias.(17) Another strength is the large sample size, which provided sufficient statistical power to  
283 examine the race- and sex-specific mean BMI and prevalence of obesity, despite not accounting  
284 for Asian American adolescents. Lastly, this study employed a rigorous multivariate survey-  
285 weighted data analysis, and accounting for key sociodemographic factors and survey cycles. This  
286 methodological approach significantly enhances the depth and reliability of the findings,  
287 strengthening the validity of the study's conclusions.

288         There are several limitations. First, the NHANES data are based on repeated cross-  
289 sectional surveys, which means that we cannot examine within-child changes over time or imply  
290 causality. However, this approach still provides a valuable snapshot of obesity prevalence among  
291 US adolescents over time. In addition, including Asian American adolescents in the other group  
292 in our analysis raises questions about the validity of current reference ranges for defining  
293 obesity.(32)

294

## 295 **Conclusions**

296         Despite efforts in public health policies and increasing awareness, the prevalence of  
297 obesity among children remains high and continues to increase among Black and Hispanic  
298 adolescents. Future research should focus on addressing key disparities suggested through this  
299 analysis and promoting health equality. The findings of our study suggest that future obesity  
300 interventions should be target to specific race/ethnic minorities and low-income families to  
301 prevent obesity. This could involve developing policies and interventions addressing social  
302 determinants of health, such as improving access to healthy food options, creating safe



- 303 environments for physical activity, and promoting culturally appropriate community-based
- 304 initiatives that support healthy lifestyles.(42)

## 306 **Acknowledgements**

307 Funding for the Socio-Spatial Determinants of Health (SSDH) Laboratory is provided  
308 through the Division of Intramural Research at the National Institute on Minority Health and  
309 Health Disparities (NIMHD), the National Institute of Health (NIH), and the NIH Distinguished  
310 Scholars Programs. Yangyang Deng is supported by the NIH Postdoctoral Intramural Research  
311 Training Award.

312

313 The views of this study are those of the authors and do not necessarily represent the  
314 views of the NIMHD, the NIH, and the U.S. Department of Health and Human Services.

315

316 No financial disclosures were reported by the authors of this paper.

317

## 318 **References**

- 319 1. Wisniewski AB, Chernaused SD. Gender in Childhood Obesity: Family Environment, Hormones,  
320 and Genes. *Gender Med.* 2009;6:76-85.
- 321 2. Sanyaolu A, Okorie C, Qi X, Locke J, Rehman S. Childhood and Adolescent Obesity in the United  
322 States: A Public Health Concern. *Glob Pediatr Health.* 2019;6:2333794X19891305.
- 323 3. Nehus E, Mitsnefes M. Childhood Obesity and the Metabolic Syndrome. *Pediatr Clin N Am.*  
324 2019;66(1):31-+.
- 325 4. Grossman DC, Bibbins-Domingo K, Curry SJ, Barry MJ, Davidson K, Doubeni CA, et al. Screening  
326 for Obesity in Children and Adolescents US Preventive Services Task Force Recommendation Statement.  
327 *Jama-J Am Med Assoc.* 2017;317(23):2417-26.
- 328 5. CDC. National Center for Health Statistics. NHANES questionnaires, datasets, and related  
329 documentation. 2020.
- 330 6. De Leonibus C, Marcovecchio ML, Chiarelli F. Update on statural growth and pubertal  
331 development in obese children. *Pediatric Rep.* 2012;4(4):119-23.
- 332 7. Woo JG, Zhang NH, Fenchel M, Jacobs DR, Hu T, Urbina EM, et al. Prediction of adult class II/III  
333 obesity from childhood BMI: the i3C consortium. *Int J Obesity.* 2020;44(5):1164-72.
- 334 8. Simmonds M, Burch J, Llewellyn A, Griffiths C, Yang H, Owen C, et al. The use of measures of  
335 obesity in childhood for predicting obesity and the development of obesity-related diseases in  
336 adulthood: a systematic review and meta-analysis. *Health Technol Assess.* 2015;19(43):1-336.
- 337 9. Ward ZJ, Bleich SN, Long MW, Gortmaker SL. Association of body mass index with health care  
338 expenditures in the United States by age and sex. *Plos One.* 2021;16(3).
- 339 10. McLaren L. Socioeconomic status and obesity. *Epidemiol Rev.* 2007;29:29-48.
- 340 11. Ogden CL, Carroll MD, Kit BK, Flegal KM. Prevalence of childhood and adult obesity in the United  
341 States, 2011-2012. *JAMA.* 2014;311(8):806-14.
- 342 12. Ogden CL, Fryar CD, Hales CM, Carroll MD, Aoki Y, Freedman DS. Differences in Obesity  
343 Prevalence by Demographics and Urbanization in US Children and Adolescents, 2013-2016. *Jama-J Am*  
344 *Med Assoc.* 2018;319(23):2410-8.
- 345 13. Hu K, Staiano AE. Trends in Obesity Prevalence Among Children and Adolescents Aged 2 to 19  
346 Years in the US From 2011 to 2020. *Jama Pediatr.* 2022;176(10):1037-9.
- 347 14. Shah B, Tombeau Cost K, Fuller A, Birken CS, Anderson LN. Sex and gender differences in  
348 childhood obesity: contributing to the research agenda. *BMJ Nutr Prev Health.* 2020;3(2):387-90.
- 349 15. Skelton JA, Cook SR, Auinger P, Klein JD, Barlow SE. Prevalence and Trends of Severe Obesity  
350 Among US Children and Adolescents. *Acad Pediatr.* 2009;9(5):322-9.
- 351 16. Wang YC, Gortmaker SL, Taveras EM. Trends and racial/ethnic disparities in severe obesity  
352 among US children and adolescents, 1976-2006. *International Journal of Pediatric Obesity.* 2011;6(1):12-  
353 20.
- 354 17. Frederick CB, Snellman K, Putnam RD. Increasing socioeconomic disparities in adolescent  
355 obesity. *Proc Natl Acad Sci U S A.* 2014;111(4):1338-42.
- 356 18. Singh GK, Kogan MD, van Dyck PC. Changes in State-Specific Childhood Obesity and Overweight  
357 Prevalence in the United States From 2003 to 2007. *Arch Pediatr Adol Med.* 2010;164(7):598-607.
- 358 19. Wang Y, Beydoun MA. The obesity epidemic in the United States - Gender, age, socioeconomic,  
359 Racial/Ethnic, and geographic characteristics: A systematic review and meta-regression analysis.  
360 *Epidemiol Rev.* 2007;29:6-28.
- 361 20. Veugelers PJ, Fitzgerald AL. Prevalence of and risk factors for childhood overweight and obesity.  
362 *CMAJ.* 2005;173(6):607-13.

- 363 21. Galfo M, D'Addezio L, Censi L, Roccaldo R, Martone D. Overweight and Obesity in Italian  
364 Adolescents: Examined Prevalence and Socio-Demographic Factors. *Cent Eur J Publ Heal*.  
365 2016;24(4):262-7.
- 366 22. CDC. National Health and Nutrition Examination Survey, Centers for Disease Control and  
367 Prevention National Center for Health Statistics. 2022.
- 368 23. Kuczmarski RJ, Ogden CL, Guo SS, Grummer-Strawn LM, Flegal KM, Mei Z, et al. 2000 CDC  
369 Growth Charts for the United States: methods and development. *Vital Health Stat* 11. 2002(246):1-190.
- 370 24. Gavin L, MacKay AP, Brown K, Harrier S, Ventura SJ, Kann L, et al. Sexual and reproductive health  
371 of persons aged 10-24 years - United States, 2002-2007. *MMWR Surveill Summ*. 2009;58(6):1-58.
- 372 25. Du Y, Liu BY, Sun YB, Snetselaar LG, Wallace RB, Bao W. Trends in Adherence to the Physical  
373 Activity Guidelines for Americans for Aerobic Activity and Time Spent on Sedentary Behavior Among US  
374 Adults, 2007 to 2016. *Jama Netw Open*. 2019;2(7).
- 375 26. Hales CM, Fryar CD, Carroll MD, Freedman DS, Ogden CL. Trends in Obesity and Severe Obesity  
376 Prevalence in US Youth and Adults by Sex and Age, 2007-2008 to 2015-2016. *Jama-J Am Med Assoc*.  
377 2018;319(16):1723-5.
- 378 27. Jackson SL, Yang EC, Zhang ZF. Income Disparities and Cardiovascular Risk Factors Among  
379 Adolescents. *Pediatrics*. 2018;142(5).
- 380 28. Korn EL, Graubard BI. Epidemiologic Studies Utilizing Surveys - Accounting for the Sampling  
381 Design. *American Journal of Public Health*. 1991;81(9):1166-73.
- 382 29. Prevention CfDca. Childhood obesity facts. 2021.
- 383 30. Tsoi MF, Li HL, Feng Q, Cheung CL, Cheung TT, Cheung BMY. Prevalence of Childhood Obesity in  
384 the United States in 1999-2018: A 20-Year Analysis. *Obesity Facts*. 2022;15(4):560-9.
- 385 31. Ogden CL, Carroll MD, Lawman HG, Fryar CD, Kruszon-Moran D, Kit BK, et al. Trends in Obesity  
386 Prevalence Among Children and Adolescents in the United States, 1988-1994 Through 2013-2014. *Jama-  
387 J Am Med Assoc*. 2016;315(21):2292-9.
- 388 32. Skinner AC, Ravanbakht SN, Skelton JA, Perrin EM, Armstrong SC. Prevalence of Obesity and  
389 Severe Obesity in US Children, 1999-2016. *Pediatrics*. 2018;141(3).
- 390 33. Eyre ELJ, Duncan MJ, Nevill A. South Asian Children Have Increased Body Fat in Comparison to  
391 White Children at the Same Body Mass Index. *Children-Basel*. 2017;4(11).
- 392 34. Lobstein T, Baur L, Uauy R, TaskForce IIO. Obesity in children and young people: a crisis in public  
393 health. *Obes Rev*. 2004;5 Suppl 1:4-104.
- 394 35. Burke MP, Martini LH, Blake CE, Younginer NA, Draper CL, Bell BA, et al. Stretching Food and  
395 Being Creative: Caregiver Responses to Child Food Insecurity. *J Nutr Educ Behav*. 2017;49(4):296-303.
- 396 36. Biggs BK, Tolleson E, Millerbernd J, Bronars C, Meiers SJ, Slowiak K, et al. Identifying  
397 Opportunities to Promote Physical Activity in a Diverse Low-Income Population: A Mixed-Method Study  
398 at a Boys & Girls Club Site. *Child Youth Care For*. 2020;49(2):171-200.
- 399 37. Chang SH, Kim K. A review of factors limiting physical activity among young children from low-  
400 income families. *J Exerc Rehabil*. 2017;13(4):375-7.
- 401 38. Shrewsbury V, Wardle J. Socioeconomic status and adiposity in childhood: A systematic review  
402 of cross-sectional studies 1990-2005. *Obesity*. 2008;16(2):275-84.
- 403 39. Chung A, Backholer K, Wong E, Palermo C, Keating C, Peeters A. Trends in child and adolescent  
404 obesity prevalence in economically advanced countries according to socioeconomic position: a  
405 systematic review. *Obes Rev*. 2016;17(3):276-95.
- 406 40. Cohen DA, Han B, Derose KP, Williamson S, Marsh T, Rudick J, et al. Neighborhood poverty, park  
407 use, and park-based physical activity in a Southern California city. *Soc Sci Med*. 2012;75(12):2317-25.
- 408 41. Drewnowski A, Darmon N. Food choices and diet costs: an economic analysis. *J Nutr*.  
409 2005;135(4):900-4.

410 42. Suglia SF, Shelton RC, Hsiao A, Wang YC, Rundle A, Link BG. Why the Neighborhood Social  
411 Environment Is Critical in Obesity Prevention. J Urban Health. 2016;93(1):206-12.  
412

## 413 **Supporting information**

414

415 S Table 1. BMI Changes in Adolescents aged 10-19 years old, stratify by overall, sex, age,  
416 race/ethnicity, and poverty ratio from 2007 to 2020 (n=9,816)

417

418 S Table 2. Prevalence of Obesity in Adolescents aged 10-19 years old, stratify by overall, sex,  
419 age, race/ethnicity, and poverty ratio from 2007 to 2020 (n=2,346)

420

421

422 S Fig 1. Sample size flowchart

423

424 S Fig 2. Trends in mean BMI obesity among US adults (aged 10-19), NHANES 2007-2020 by Sex, Age,  
425 race/ethnicity and Poverty income Ratio (Details see in Supplemental Table 1).

426

427

428

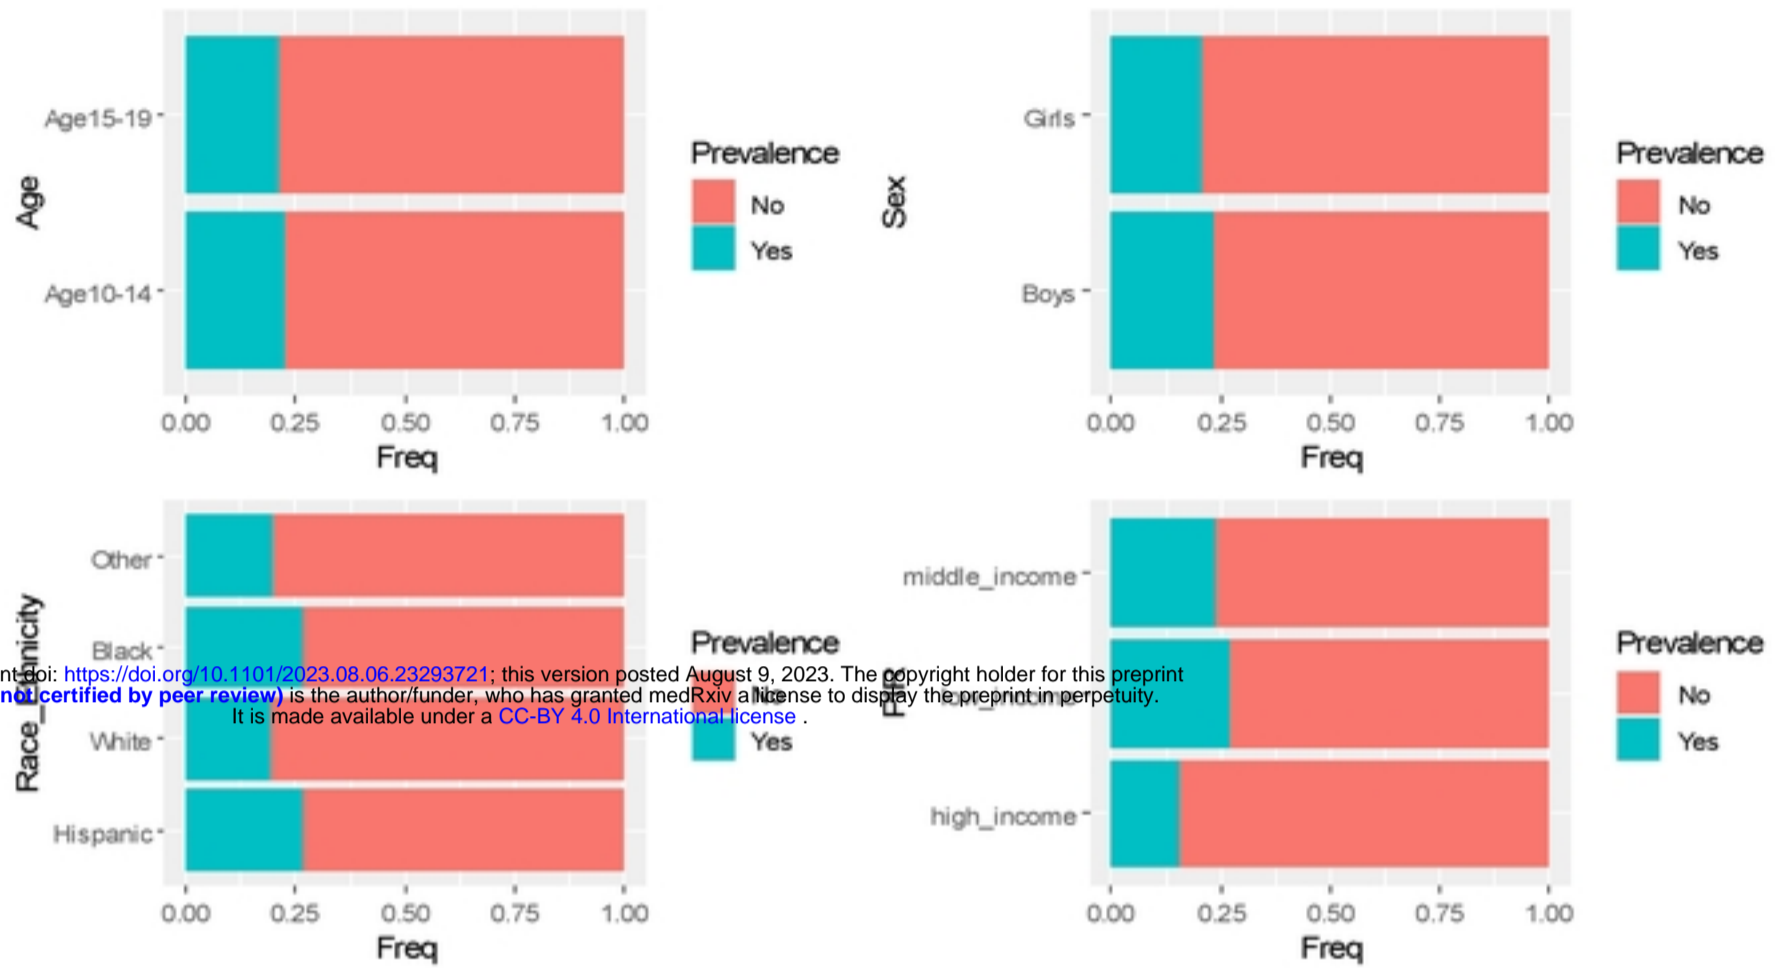

medRxiv preprint doi: <https://doi.org/10.1101/2023.08.06.23293721>; this version posted August 9, 2023. The copyright holder for this preprint (which was not certified by peer review) is the author/funder, who has granted medRxiv a license to display the preprint in perpetuity. It is made available under a [CC-BY 4.0 International license](https://creativecommons.org/licenses/by/4.0/).

Fig 1. Weighted proportions in obesity prevalence, stratified by age, sex, race/ethnicity, and PIR from 2007-2008 to 2017-2020

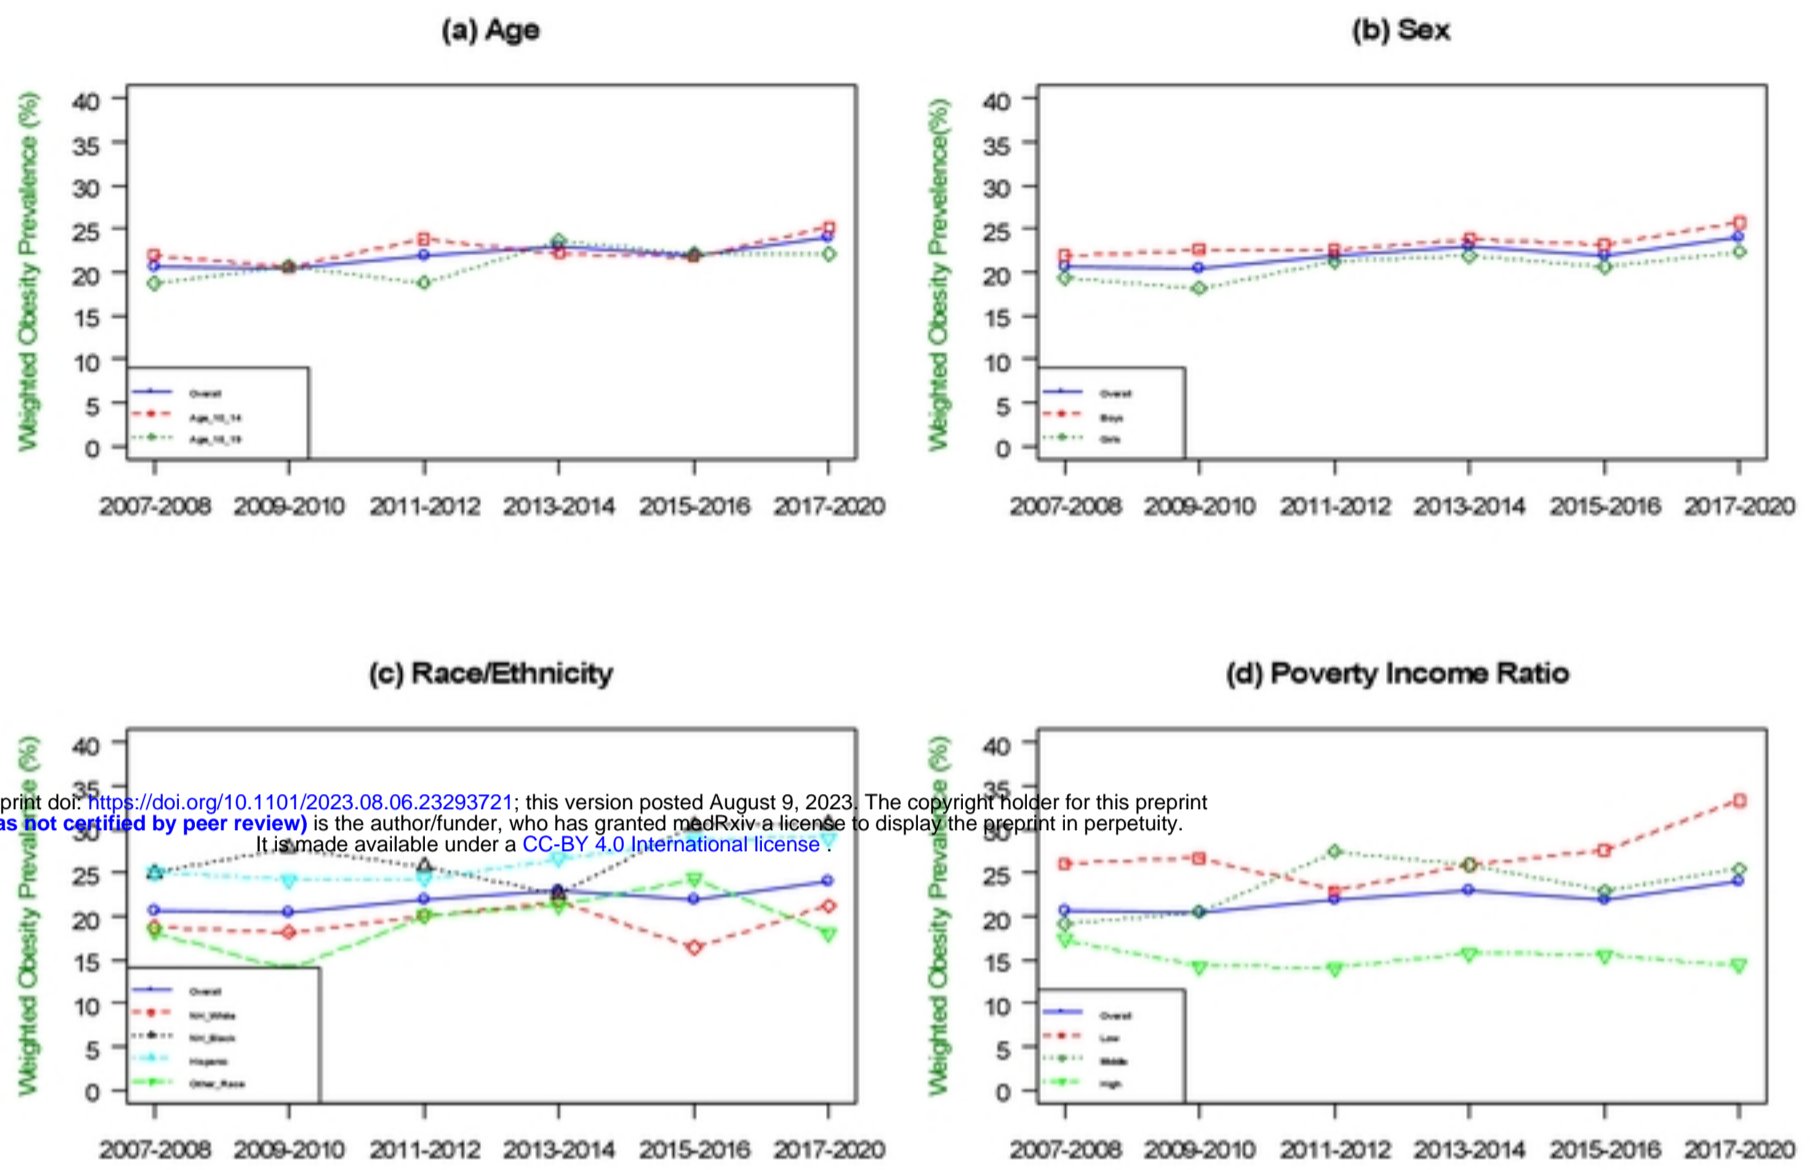

Fig 2. Trends in prevalence of obesity among US adults (aged 10-19), NHANES 2007-2020 by (a) Age, (b) Sex, (c) Race/ethnicity, and (d) Poverty income ratio.
